# Supplementary material for: Genome-wide 5-hydroxymethylcytosine modification pattern is a novel epigenetic feature of globozoospermia
Source: PubMed Central journal article supplement (PMC4466632; doi:10.18632/oncotarget.3163), 2015-02-02
Supplement: oncotarget-06-6535-s001.pdf [file oncotarget-06-6535-s001.pdf]

## **SUPPLEMENTARY TABLES**

**Supplementary Table S1: 5hmC-enriched peaks in normal, abnormal, and globozoospermia sperm**

**Supplementary Table S2: Total and specific 5hmC-containing gene lists in normal, abnormal, and globozoospermia sperm**

**Supplementary Table S3: Functional analysis of 5hmC-containing genes in normal, abnormal, and globozoospermia sperm**
